# Supplementary material for: Dynamic restructuring of nickel sulfides for electrocatalytic hydrogen evolution reaction
Source: PubMed Central journal article supplement (PMC11196257; doi:10.1038/s41467-024-49015-4), 2024-06-24
Supplement: 41467_2024_49015_MOESM3_ESM.pdf [file 41467_2024_49015_MOESM3_ESM.pdf]

## Description of Additional Supplementary Files

**Supplementary Data 1:** The atomic coordinates of the optimized computational models used for electronic structure calculations and molecular dynamics simulations reported in the manuscript.
